1 **Membrane stretching activates calcium-permeability of putative fission yeast Pkd2 channel**

2 Abhishek Poddar<sup>1,#</sup>, Yen-Yu Hsu<sup>2,#</sup>, Faith Zhang<sup>1</sup>, Clare Muller<sup>1</sup>, Mamata Malla<sup>1</sup>, Allen

3 Liu<sup>2,3,4,5,\*</sup> and Qian Chen<sup>1,\*</sup>

4 <sup>1</sup>: Department of Biological Sciences, The University of Toledo, 2801 West Bancroft Street,  
5 Toledo, OH, 43606

6 <sup>2</sup>: Department of Mechanical Engineering, University of Michigan, Ann Arbor, 2350 Hayward  
7 Street, Ann Arbor, MI 48109

8 <sup>3</sup>: Department of Biomedical Engineering, University of Michigan, Ann Arbor, Ann Arbor, MI  
9 48109

10 <sup>4</sup>: Department of Biophysics, University of Michigan, Ann Arbor, Ann Arbor, MI 48109

11 <sup>5</sup>: Cellular and Molecular Biology Program, University of Michigan, Ann Arbor, Ann Arbor, MI  
12 48109

13

14 #: Equal contributions

15 \*: Co-corresponding authors

16 Running title: mechanosensitive channel Pkd2

17 Abbreviations:

18 Keywords: Pkd2, calcium, fission yeast, polycystin

19

20 **Abstract**

21 Pkd2 is the fission yeast homolog of polycystins. This putative ion channel localizes to the  
22 plasma membrane and is required for the expansion of cell volume during interphase growth and  
23 cytokinesis, the last step of cell division. However, the channel activity of Pkd2 remains  
24 untested. Here, we examined the calcium permeability and mechanosensitivity of Pkd2 through  
25 in vitro reconstitution and calcium imaging of the *pkd2* mutant cells. Pkd2 was translated and  
26 inserted into the lipid bilayer of giant unilamellar vesicles using a cell-free expression system.  
27 The reconstituted Pkd2 permeated calcium when the membrane was stretched via hypo-osmotic  
28 shock. In vivo, inactivation of Pkd2 through a temperature-sensitive mutation *pkd2-B42* reduced  
29 the average intracellular calcium level by 34%. Compared to the *wild type*, the hypomorphic  
30 mutation *pkd2-81KD* reduced the amplitude of hypo-osmotic shock-triggered calcium spikes by  
31 59%. This *pkd2* mutation also reduced the long-term adaption of fission yeast to hypo-osmotic  
32 shock through nuclear translocation of the transcription factor Prz1. We concluded that the  
33 fission yeast polycystin Pkd2 is calcium-permeable when activated by membrane stretching,  
34 likely representing a novel eukaryotic mechanosensitive channel that can sense membrane  
35 tension and activate calcium signaling pathways (189 words).

36

37

## 38 **Introduction**

39 Polycystins are evolutionarily-conserved calcium-permissive cation channels. Loss of function  
40 mutations of human polycystins leads to one of the most common genetic disorders, Autosomal  
41 Dominant Polycystic Kidney Disorder (ADPKD) which is diagnosed in 1 in 1000 live births  
42 (Hughes et al., 1995; Mochizuki et al., 1996). Homologs of polycystins have been found in most  
43 metazoans, including fruit flies and worms (Barr and Sternberg, 1999; Gao et al., 2003), as well  
44 as unicellular organisms such as social amoebae (Lima et al., 2014), green algae (Huang et al.,  
45 2007) and fission yeast (Palmer et al., 2005).

46 The fission yeast polycystin homolog Pkd2 is an essential protein required for cell  
47 division and growth. Pkd2 localizes to the plasma membrane throughout the cell cycle (Morris et  
48 al., 2019). During interphase, it is enriched at cell tips where the putative channel promotes the  
49 extension of the cylindrical-shaped fission yeast cells (Sinha et al., 2022). During cytokinesis,  
50 Pkd2 moves to the equatorial plane, regulating contractile ring constriction and cell separation  
51 (Morris et al., 2019). Without Pkd2, the daughter cells fail to separate. In addition, Pkd2  
52 antagonizes the activity of yeast Hippo signaling pathway SIN (septation initiation network) by  
53 modulating its activity and localization during cytokinesis (Sinha et al., 2022). Although fission  
54 yeast cytokinesis is accompanied by a temporary increase in intracellular calcium concentration  
55 (Poddar et al., 2021), it remains unclear if Pkd2 permeates calcium in this process and how it is  
56 activated.

57 Reconstitution experiments using bottom-up in vitro expression of transmembrane  
58 proteins, including ion channels, have become a powerful approach to investigate their functions,  
59 compared to using purified proteins expressed in cells. For expression of certain proteins in cells,  
60 growth retardation or lysis of the host cells and low endogenous expression levels attribute to

61 poor production of heterologous recombinant proteins (Laohakunakorn et al., 2020). Despite  
62 advances in protein purification, several limitations exist for invitro reconstitution of membrane  
63 proteins with complicated structures, such as improper protein function, compromised membrane  
64 integrity due to residual detergents, and poor control over the orientation of protein insertion (Jia  
65 and Jeon, 2016; Knol et al., 1998; Rigaud and Levy, 2003; Shen et al., 2016; Wingfield, 2015).  
66 Cell-free expression (CFE) systems coupling transcription and translation reactions outside the  
67 cellular environment have shown the potential to overcome the barriers mentioned above and can  
68 be a robust strategy for protein synthesis and investigation (Chong, 2014; Gregorio et al., 2019;  
69 Khambhati et al., 2019; Lu, 2017; Rigaud and Levy, 2003). For example, the bacterial  
70 mechanosensitive channel MscL is expressed by encapsulating CFE reactions in giant  
71 unilamellar vesicles (GUVs) and has been shown to sense physical stimuli (Majumder et al.,  
72 2017). Since bacterial lysate lacks membranous components, eukaryotic CFE systems are  
73 gaining increasing attention for in vitro production of membrane proteins (Dondapati et al.,  
74 2014). Their innate endogenous microsomal structures enable newly synthesized membrane  
75 proteins to insert directly into the natural endoplasmic reticulum (ER)-based lipid bilayers  
76 without detergents. This eukaryotic CFE-based approach significantly reduces the potential for  
77 membrane protein denaturation and favors their proper folding in vitro.

78         In this study, we first expressed the putative channel Pkd2 in a HeLa-based CFE system  
79 and reconstituted it in a lipid bilayer. To determine the orientation of Pkd2 in the membrane, we  
80 used a pronase digestion assay with *Streptomyces griseus*-derived pronase (Xu et al., 1988). We  
81 applied different osmotic pressures to GUVs coexpressing Pkd2 and G-GECO, a fluorescent  
82 calcium-sensitive reporter. To determine whether Pkd2 regulates calcium influx in vivo, we  
83 employed a GCaMP-based calcium indicator and single-cell imaging to quantify the intracellular

84 calcium level of two *pkd2* mutants. We then induced fast expansion of the plasma membrane  
85 using microfluidics-applied osmotic shock and found that the calcium spikes in the *pkd2* mutant  
86 cells decreased significantly compared to the *wild type*. We concluded that Pkd2 is calcium-  
87 permeable when activated by membrane stretching and is likely a novel mechanosensitive ion  
88 channel in eukaryotes.

## 89 **Results**

### 90 **Expressing Pkd2 by using mammalian CFE**

91 We used a CFE system to synthesize this putative channel Pkd2 in vitro. We expressed full-  
92 length Pkd2 tagged with superfold GFP (sfGFP) at the C-terminus in a HeLa cell extract-based  
93 system. To monitor expression yield, we quantified the fluorescence of Pkd2-sfGFP over 3 hours  
94 (**Fig. S1**). The fluorescence increased gradually and reached a plateau after 2 hours. We  
95 concluded that Pkd2 is efficiently expressed in our cell-free system.

96 We then determined if the in vitro-synthesized Pkd2 can be reconstituted as a  
97 transmembrane protein in supported lipid bilayers with extra reservoir (SUPER) templates (**Fig.**  
98 **1A**). The excess lipid bilayer membranes were generated on silica beads by the rupture and  
99 fusion of small unilamellar vesicles (SUVs) carrying lipids with negative charges under high  
100 ionic strength (Majumder et al., 2018; Pucadyil and Schmid, 2008; Pucadyil and Schmid, 2010).  
101 We incubated SUPER templates with the in vitro-translated Pkd2-sfGFP and isolated them by  
102 low-speed centrifugation. The supernatant fraction contained most of the CFE reaction, while the  
103 pellet fraction included the SUPER templates for different assays (**Fig. 1A**). The expressed  
104 protein appeared as a single band of ~108 kDa on an SDS-PAGE gel (**Fig. 1B**), which was  
105 consistent with the predicted molecular weight of the fusion protein ( $MW_{\text{Pkd2}} = 78$  kDa). The  
106 yield was roughly 15  $\mu\text{g}$  from a 10  $\mu\text{l}$  reaction. The lipid-coated beads incubated with pellet

107 fraction became fluorescent after being washed with PBS (**Fig. 1C**), thereby confirming that  
108 Pkd2-sfGFP was incorporated into the SUPER templates.

109         Since several Pkd2 homologs, including the human homologs, localize to the ER and  
110 plasma membrane (Gonzalez-Perrett et al., 2001; Hughes et al., 1995; Protchenko et al., 2006),  
111 we investigated whether Pkd2 similarly translocate into endogenous microsomal structures. We  
112 applied a high-speed airfuge assay to CFE-expressed Pkd2, labeled with fluorescently tagged  
113 lysine, Green lysine, to isolate supernatant and pellet fractions; the latter presumably contained  
114 microsomes (**Fig. S2A**). The majority of Pkd2 was in the pellet, while the amount of Pkd2 in the  
115 supernatant decreased as the washing cycles was increased (**Fig. S2B**). This indicated that ER  
116 fragments might recognize translocons and membrane protein chaperones to promote Pkd2  
117 insertion into microsomes. When the pellet or supernatant fractions were added to the SUPER  
118 templates, only the beads incubated with the pellet fraction were fluorescent (**Fig. S2C**). We  
119 concluded that in vitro-expressed Pkd2 translocates into microsomal fragments, which  
120 subsequently fused with the SUPER templates.

### 121 **Reconstituted Pkd2 responds to osmotic pressure to permeate calcium**

122 We next determined the orientation of Pkd2 in the lipid bilayer membranes on SUPER templates  
123 using an image-based pronase protection assay. Alpha-fold (Jumper et al., 2021) and other  
124 transmembrane helices projection software predicted that Pkd2 possesses an N-terminal  
125 extracellular domain and a putative C-terminal cytoplasmic tail (**Fig. S3A**). Depending on the  
126 orientation of Pkd2-sfGFP in the lipid bilayer, sfGFP will either be exposed to pronase or be  
127 protected from degradation (**Fig. S3B**). Based on our previous work on reconstituting nuclear  
128 envelope proteins SUN1 and SUN2 in SUPER templates (Majumder et al., 2018), we predicted  
129 that Pkd2 would insert into the excess lipid bilayer membranes with its C-terminus orienting

130 outwards. We observed that the fluorescence of in vitro-translated Pkd2-sfGFP disappeared  
131 following pronase treatment (**Fig. S3C**). We concluded that Pkd2 is inserted in microsomal  
132 fragments in an orientation that positions its C-terminus on the cytosolic side. For the GUVs we  
133 used in our experiment, the C-terminus of Pkd2-sfGFP would be in the lumen of the vesicle, an  
134 orientation consistent with their predicted topology in cells (**Fig. 2A**) since CFE reactions were  
135 encapsulated in vesicles.

136 We next determined whether reconstituted Pkd2 alone is calcium permissive. We  
137 encapsulated CFE-expressed Pkd2 in GUVs generated using continuous droplet interface  
138 crossing encapsulation (cDICE) (Bashirzadeh et al., 2021; Van de Cauter et al., 2021) and  
139 monitored calcium entry in GUVs (**Fig. 2B**). A genetically-encoded calcium fluorescent reporter,  
140 G-GECO, was used to detect calcium entry into vesicles (Majumder et al., 2017). There was no  
141 G-GECO fluorescence in GUVs under iso-osmotic conditions with or without Pkd2 expression  
142 (**Fig. 2C**), indicating that CFE-expressed Pkd2 is mostly non-permeable to calcium without a  
143 stimulus.

144 To determine whether Pkd2 can become calcium-permeable upon mechanical stimulus,  
145 we stretched the membrane of Pkd2-expressing GUVs with hypo-osmotic shock. We added  
146 water to the external solution of the GUVs. The G-GECO fluorescence in Pkd2-embedded GUVs  
147 gradually increased under a hypo-osmotic condition of 100 mOsm, compared to those without  
148 Pkd2 (**Fig. 2C**). The fluorescence increase was proportional to calcium concentrations in the  
149 external solution (**Fig. S4**). When gadolinium chloride ( $GdCl_3$ ), a non-specific stretch-activated  
150 ion channel blocker, was added to the external solution, it blocked the fluorescence increase of  
151 G-GECO inside those Pkd2-expressing GUVs under same conditions (**Fig. 2D**). As expected,  
152 the peak fluorescence intensities of GUVs increased proportionally to the strength (40-100

153 mOsm) and duration (0-20 mins) of hypo-osmotic shock (**Fig. 2E and F**). We concluded that  
154 Pkd2 is calcium-permeable under the mechanical stimulus of membrane stretching.

### 155 **Intracellular calcium level was lower in *pkd2* mutants**

156 To determine if calcium-permissive Pkd2 regulates calcium homeostasis in fission yeast cells,  
157 we measured the calcium level of *pkd2-81KD*, a hypomorphic mutant with growth and  
158 cytokinesis defects even at the permissive temperature (Morris et al., 2019). We employed the  
159 ratiometric indicator GCaMP-mCherry to measure the intracellular calcium level of single cells  
160 (Poddar et al., 2021) by quantifying the ratio of fluorescence intensity of GCaMP to that of  
161 mCherry (**Fig. 3A**). At 25°C, the intracellular calcium level of mutant cells (n > 450) decreased  
162 only slightly (3%) compared to *wild type* cells (**Fig. 3B**). Next, we measured the calcium level of  
163 a novel temperature-sensitive *pkd2* mutant at the restrictive temperature (Sinha et al., 2022). At  
164 36°C, the average calcium level of *pkd2-B42* cells was 34% lower than *wild type* cells (**Fig. 3C**  
165 **and D**). To rule out the possibility that reduced calcium concentration was an indirect result of  
166 either cytokinesis or growth defects of the *pkd2* mutant, we examined two other temperature-  
167 sensitive mutants, *sid2-250* and *orb6-25*. The former fails in cytokinesis, and the latter is  
168 defective in cell growth (Balasubramanian et al., 1998; Verde et al., 1998). In comparison to  
169 *pkd2-B42*, the intracellular calcium concentration of the *sid2-250* mutant cells was only slightly  
170 lower (by 13%) than *wild type* cells at 36°C (**Fig. S5A and B**). This was despite their much  
171 stronger cytokinesis defect compared to *pkd2-B42*, evident in the substantially increased cell  
172 length (**Fig. S5A**). Contrary to *pkd2-B42*, *orb6-25* almost doubled the intracellular calcium level  
173 with a far higher frequency of cells exhibiting elevated calcium concentrations (**Fig. S5B**). We  
174 concluded that putative channel Pkd2 contributes significantly to the maintenance of intracellular  
175 calcium levels.



176           Lastly, we determined whether over-expression of Pkd2 interfered with intracellular  
177 calcium regulation. We over-expressed Pkd2 by replacing its endogenous promoter with a strong  
178 inducible promoter, 3nmt1 (Maundrell, 1990). In the induced condition, intracellular calcium  
179 levels of mutant cells was similar to that of *wild type* cells (**Fig. S5C-D**). We concluded that  
180 over-expression of Pkd2 alone is not sufficient to alter intracellular calcium levels.

### 181 **Osmotic shock-induced calcium spikes were reduced in *pkd2* mutants**

182 We next examined whether Pkd2 promotes calcium spikes triggered by plasma membrane  
183 stretching in vivo. In yeast, an abrupt drop in extracellular osmolarity triggers a sharp increase in  
184 intracellular calcium levels (Batiza et al., 1996). Such calcium spikes, accompanied by cell  
185 volume expansion, raise the intracellular calcium level by up to five-fold (Poddar et al., 2021).  
186 These spikes can be captured at the single-cell level in a microfluidic device.

187           We first determined whether such calcium spikes depend on influx from the media, a  
188 process that plasma membrane localized Pkd2 likely regulates. We first trapped the *wild type*  
189 cells in a microfluidic imaging chamber infused with the isosmotic EMM media (**Fig. 4A**). After  
190 switching to EMM plus 1.2M sorbitol for 30 minutes, we dropped the extracellular osmolarity by  
191 more than 1,300 mOsm by switching back to EMM (**Fig. 4A**). This shock caused the average  
192 width of *wild type* cells to increase significantly (**Fig. 4B**). As expected, this was accompanied  
193 by calcium spikes (**Fig. 4C**). In comparison, removing calcium from EMM media during hypo-  
194 osmotic shock reduced average amplitude of calcium spikes by 40% (**Fig. S6C, E, and F**).  
195 Similarly, 2mM EGTA in EMM media resulted in a 52% decrease in the amplitude of calcium  
196 spikes (**Fig. S6D-F**). We concluded that extracellular calcium contributes significantly to  
197 calcium spikes induced by hypo-osmotic shock.

198 We then determined whether Pkd2 contributes to osmotic shock-induced calcium spikes.  
199 We measured the spikes in *pkd2-81KD* mutant cells stimulated with hypo-osmotic shock. Like  
200 *wild type* cells, *pkd2-81KD* mutant cells expanded their width after shock, but comparably less  
201 (**Fig. 4B**). Peak amplitude of the spikes in *pkd2-81KD* cells was 59% lower than in *wild type*  
202 cells (**Fig. 4C and D**). The amplitude of the spikes in *pkd2-B42* cells was similarly reduced by  
203 62% (**Fig. 4D**). On average, the calcium level in *pkd2-81KD* returned to baseline sooner than in  
204 *wild type* after shock (**Fig. 4E**). We concluded that Pkd2 contributes significantly to calcium  
205 influx triggered by hypo-osmotic shock in vivo.

206 Lastly, we determined whether the *pkd2-81KD* mutation inhibited cellular adaptation to  
207 osmotic shock. In *wild type* cells, hypo-osmotic shock triggered a gradual accumulation of the  
208 transcription factor Prz1, tagged with GFP, in the nucleus (**Fig. 5A and B**). On average, the  
209 nuclear to cytoplasmic ratio of Prz1-GFP increased by more than two-fold (200%) in *wild type*  
210 cells (**Fig. 5C**). Once in the nucleus, Prz1 presumably will activate the transcription of many  
211 downstream target genes, allowing adaptation to hypo-osmotic shock (Hirayama et al., 2003).  
212 Compared to *wild type* cells, the nuclear enrichment of Prz1-GFP in *pkd2-81KD* cells was  
213 modest at just 50% (**Fig. 5B and 5C**). We concluded that Pkd2 contributes to adaptation of cells  
214 to hypo-osmotic shock.

## 215 **Discussion**

216 In this study, we determined the calcium permeability and activation mechanism of putative  
217 fission yeast channel Pkd2. In vitro reconstitution established Pkd2 as calcium-permeable under  
218 membrane tension. Calcium imaging of *pkd2* mutant cells demonstrated this essential protein's  
219 critical role in regulating calcium homeostasis and adaptation to hypo-osmotic shock.

220 In vitro-reconstituted Pkd2 in GUVs allowed the passage of calcium ions in a force-  
221 dependent manner. Mechanical activation of Pkd2 was proportional to the extent of membrane  
222 stretching, suggesting that only a small fraction of the transmembrane protein was activated at  
223 the lower end of the applied force. Compared to calcium spikes in the yeast cells, the calcium  
224 influx mediated by Pkd2 in vitro was relatively slow. This is likely due to the small amount of  
225 reconstituted Pkd2 in the membrane. Another reason may be that our GUVs do not have calcium  
226 buffer capabilities other than G-GECO. Nevertheless, our minimal system demonstrated that  
227 Pkd2 is calcium-permeable in response to membrane stretching.

228 The calcium permeability of reconstituted Pkd2 is consistent with the significantly  
229 reduced intracellular level of *pkd2* mutant cells. Our in vivo data has provided the first line of  
230 evidence that Pkd2 mediates calcium homeostasis in fission yeast cells. It remains to be  
231 determined whether Pkd2 is also permeable to other cations such as potassium similar to human  
232 polycystins (Liu et al., 2018).

233 The calcium spikes triggered by hypo-osmotic shock likely come from calcium influx  
234 and internal release. Removal of extracellular calcium did not quench calcium spike completely,  
235 suggesting the calcium release from the internal sources must contribute to the calcium spikes.  
236 These could come from either ER or vacuoles, the main intracellular calcium storage of yeast  
237 cells (Pittman, 2011).

238 Consistent with the mechanosensitivity of Pkd2 in vitro, it also plays a critical role in  
239 adaptation to hypo-osmotic shock when tension of the plasma membrane increases. Our result  
240 confirms the long-standing hypothesis that stretch-activated yeast channels likely contribute to  
241 osmotic adaptation whose identities have nevertheless remained unknown (Batiza et al., 1996).  
242 Considering its localization on the plasma membrane and its force-sensitivity, Pkd2 likely allows

243 the direct influx of calcium that contributes to adaptation after hypo-osmotic shock (Nakayama  
244 et al., 2012). However, it is worth noting that mutations of *pkd2* reduced calcium spike even  
245 more than removal of external calcium following hypo-osmotic shock. This strongly suggests  
246 that Pkd2 not only regulates calcium influx, but also internal release of calcium during the  
247 spiking events.

248 Correlated with reduced calcium spikes, the *pkd2* mutant cells failed to adapt effectively  
249 to hypo-osmotic shock. Fission yeast cells respond to such downshift of osmolarity by activating  
250 Prz1. This transcription factor translocates from cytoplasm to nucleus where it becomes active  
251 through dephosphorylation by the calcium-sensitive phosphatase calcineurin (Hirayama et al.,  
252 2003). Reduced activation of Prz1 in *pkd2* mutant cells likely lead to less robust adaptation  
253 through the transcription regulation, compared to *wild type*.

254 The function of Pkd2 in regulating osmotic adaptation bears some similarities to that of  
255 mechanosensitive MscC channels, but there are some critical differences. Msy1 and Msy2 are  
256 fission yeast homologs of the small bacterial conductance mechanosensitive channel MscS  
257 (Nakayama et al., 2012). Like Pkd2, Msy1 and Msy2 play a crucial role in adaptation to hypo-  
258 osmotic shock. However, unlike Pkd2, they localize to the endoplasmic reticulum (ER)  
259 (Nakayama et al., 2012). More surprisingly, deletion of both fission yeast MscS channels leads to  
260 enhanced calcium spikes following hypo-osmotic shock (Nakayama et al., 2012), contrary to the  
261 phenotype of *pkd2-81KD* mutant cells. The potential interlink between polycystin and MscS  
262 channels will require further analysis.

263 The force-sensitive nature of putative channel Pkd2, combined with its localization on the  
264 plasma membrane, makes it an ideal candidate to sense membrane tension and regulate turgor  
265 pressure homeostasis during cell growth. The key phenotype of *pkd2* mutants is their failure to

266 maintain turgor pressure required for both tip extension and cell separation. This putative  
267 channel could play a critical role in maintaining turgor pressure during cell growth, as the cell  
268 volume expands. Pkd2 is a potential candidate for the known mechanosensitive channel  
269 regulating the turgor pressure of fission yeast (Zhou and Kung, 1992).

270         The calcium permeability of Pkd2 is similar to that of mammalian polycystins, but its  
271 mechanosensitivity is distinct. Like Pkd2, human polycystin channels also regulate intracellular  
272 calcium levels (Liu et al., 2018; Wang et al., 2019). Moreover, of the two mammalian  
273 homologues, polycystin-1 is sensitive to mechanical stimulus (Forman et al., 2005). However,  
274 the mammalian polycystin channels mostly localize to primary cilia where they are activated by  
275 mechanical force from fluid flow (Nauli et al., 2003).

276         Our results support the hypothesis that Pkd2 is a calcium-permissible ion channel  
277 activated by membrane stretching that allows fission yeast cells to maintain membrane tension  
278 during cell growth, osmotic adaption, and cytokinesis.

279

280

## 281 **Materials and Methods**

### 282 **DNA construct**

283 Pkd2-sfGFP was constructed through High-Fi DNA Assembly (NEB). All PCR reactions were  
284 carried out with Q5 High-Fidelity DNA Polymerase (NEB #M0491). The cDNA of Pkd2 was  
285 amplified from the plasmid Pkd2-EGFP-N1 (Lab stock) using the forward primer  
286 AACCTCAAAGACAAGACCATGAGGCTTTGGAGAAGCCC and the reverse primer,  
287 AAGAATTCGTCGACCTCGAGACGAAAAGCATTGTTAGGTA. The vector pAV0714  
288 (Vjestica et al., 2020) was amplified using the forward primer,  
289 TACCTAACAAATGCTTTTCGTCTCGAGGTCGACGAATTCTT and the reverse primer,  
290 GGGCTTCTCAAAGCCTCATGGTCTTGTCTTTTGAGGGTT. The PCR products were then  
291 digested with DpnI for 1 hour at 37°C and purified with Macherey-Nagel NucleoSpin Gel and  
292 PCR Clean-up kit (NC0389463). The purified fragments were assembled through HiFi DNA  
293 Assembly (NEB, E2621S) to generate the Pkd2-sfGFP construct (QC-V199).

294 To generate Pkd2-His<sub>6</sub> and Pkd2-sfGFP-His<sub>6</sub> for the HeLa CFE reaction, the SUN1<sup>FL</sup>-  
295 His<sub>6</sub> construct in pT7-CFE1-Chis (Majumder et al., 2018) was used as a template for Gibson  
296 assembly cloning. Initially, Pkd2 was amplified from QC-V199 using the primers Pkd2 –  
297 Forward: CCACCACCCATATGGGATCCGAATTCATGAGGCTTTGGAGAAGCCC and  
298 Pkd2 – Reverse:  
299 CTCGAGTGCGGCCGCGTCGACTTAACGAAAAGCATTGTTAGGTAATGG with Phusion  
300 High-Fidelity DNA Polymerase. The DNA of Pkd2–sfGFP was amplified from QC-V199 using  
301 the primers Pkd2 – sfGFP – Forward:  
302 CACCCATATGGGATCCGAATTCATGAGGCTTTGGAGAAGCCCAC and Pkd2 – sfGFP –  
303 Reverse: CGAGTGCGGCCGCGTCGACCTTATAAAGCTCGTCCATTCCGTGAG. The next  
304 step was to insert Pkd2 or Pkd2-sfGFP into pT7-CFE1-CHis downstream from the T7 promoter

305 construct by replacing SUN1<sup>FL</sup> with Pkd2 in the pT7-CFE1-CHis construct (Thermo Fisher  
306 Scientific). To remove SUN1<sup>FL</sup> from the pT7-CFE1-SUN1<sup>FL</sup>-His<sub>6</sub> construct (Majumder et al.,  
307 2019) as the backbone, we used primers pT7-CFE-Forward:  
308 GAATGGACGAGCTTTATAAGGTCGACGCGGCCGCACTC and pT7-CFE-Reverse:  
309 GCTTCTCCAAAGCCTCATGAATTTCGGATCCCATATGGGTGGTG with Phusion High-  
310 Fidelity DNA Polymerase for PCR amplification. Afterward, the resulting PCR products, Pkd2,  
311 Pkd2-sfGFP, and pT7CFE-CHis, were digested with DpnI for 1 hour at 37°C and subsequently  
312 purified with the QIAquick Gel Extraction Kit (Qiagen #28704). They were ligated with  
313 homemade Gibson Master Mix (**Table S1**) to create pT7-CFE1-Pkd2-CHis and pT7-CFE1-  
314 Pkd2-sfGFP-CHis constructs.

### 315 **CFE reaction**

316 We used the 1-Step Human Coupled IVT Kit (Thermo Fisher Scientific #88881) to produce  
317 Pkd2 protein in vitro. The reaction was carried out based on the manufacturer's protocol. Briefly,  
318 1 µl plasmid DNA (~500 ng/µl) was used for one 10 µl reaction. G-GECO plasmid was used in a  
319 previous study (Majumder et al., 2017). CFE reactions were carried out at 30°C for 3 hours.  
320 Pkd2-sfGFP expression was measured on a fluorescence plate reader (Biotek Synergy H1).

### 321 **SUPER template generation**

322 Supported bilayer with excess membrane reservoir (SUPER) templated beads were generated  
323 following a published protocol (Neumann et al., 2013). For SUPER template formation, 25 µl of  
324 small unilamellar vesicle (SUV) solution was fused with 2 µl of 5 µm silica beads (Bangs  
325 Laboratories) in the presence of 1 M NaCl. The final SUPER templated beads were washed with  
326 PBS twice by centrifuging at 200 g for 2 minutes and then resuspended in 30 µl of milli-Q water  
327 at a final concentration of  $\sim 9.6 \times 10^6$  beads/ml. The SUPER template stock can be stored at room  
328 temperature for 3 hours.

329 For SUV generation, 75% 1,2-dioleoyl-*sn*-glycero-3-phosphatidylcholine (DOPC),  
330 24.9% cholesterol, and 0.1% Rhod-PE for a final concentration of 1 mM were mixed and dried  
331 under vacuum for 1 hour. 1 ml milli-Q water was then added, and the tube was thoroughly  
332 vortexed. The mixture was then passed through a liposome-extruder (T&T Scientific, Knoxville,  
333 TN) with 100 nm porous membrane for 11 times to generate SUVs.

### 334 **Vesicle encapsulation system**

335 Vesicles were generated by modifying the continuous droplet interface crossing encapsulation  
336 (cDICE) method. The device contains a rotor chamber made with clear resin using a 3D printer  
337 (Formlabs) mounted on the servo motor of a benchtop stir plate. The procedure involves an inner  
338 solution (IS), outer solution (OS), and lipid-in-oil solution (LOS). HeLa-based CFE reactions  
339 with the addition of 5% OptiPrep (to increase the density to aid sedimentation of GUVs) were  
340 prepared as the IS. OS stock (115 mM HEPES, 23 mM MgCl<sub>2</sub>, 1.15M KCl, 770 mM glucose)  
341 was diluted with Milli-Q water to the same osmolarity matching that of the IS. The LOS consists  
342 of 40% DOPC, 30% DOPE, 29.9% cholesterol, and 0.1% Rhod-PE in mole percentage with a  
343 total lipid concentration of 0.4 mM was thoroughly mixed with the desired volume of 1:4  
344 mineral oil:silicon oil by vortexing for at least 10 seconds. The water-in-oil emulsion was first  
345 generated by vigorously pipetting CFE reactions in 500  $\mu$ L of LOS ~10 times. 700  $\mu$ L of  
346 aqueous OS, 5 mL of LOS and the water-in-oil emulsion were then sequentially added into the  
347 cDICE chamber rotating at 700 rpm. After 2 minutes of rotation, vesicles accumulating in the OS  
348 near the chamber wall could be gently collected from the capped hole near the outer edge of the  
349 chamber.

### 350 **Airfuge fractionation assay**

351 After the CFE reaction was completed, it was collected in a 1.5 mL microcentrifuge tube and



352 then mixed well with 30  $\mu$ l of extraction buffer (20 mM HEPES-KOH, pH 7.5, 45 mM  
353 potassium acetate, 45 mM KCl, 1.8 mM magnesium acetate, 1 mM dithiothreitol (DTT)). 40  $\mu$ l  
354 of the mixture was then transferred to an ultracentrifuge tube and centrifuged at around 100,000  
355 g for 15 minutes at room temperature using an airfuge (Beckman Coulter). After the  
356 centrifugation, 20  $\mu$ l of the supernatant was carefully recovered and transferred to a 1.5 mL  
357 microcentrifuge tube without disturbing the pellet, and the remaining 20  $\mu$ l of pellet fraction was  
358 resuspended by pipetting up and down to thoroughly mix before transferring to another  
359 microcentrifuge tube. The centrifugation cycles mentioned above can be repeated multiple times,  
360 as shown in **Fig. S2A**. To investigate the protein incorporation, 2  $\mu$ l of SUPER templated beads  
361 were added and incubated with the supernatant and pellet fractions respectively for 30 minutes at  
362 room temperature and then centrifuged at 300 g for 3 minutes. After the centrifugation, SUPER  
363 templated beads were visible as a small white pellet, and the remaining supernatant was collected  
364 as the final pellet fraction. The SUPER template pellets were washed twice with PBS by  
365 centrifuging at 200 g for 2 minutes and then resuspended in 30  $\mu$ l of milli-Q water at a final  
366 concentration of  $\sim 9.6 \times 10^6$  beads/ml. Following the recovery of fractions, the amount of cell-free  
367 expressed Pkd2 in each fraction can be determined by visualizing fluorescence proteins on an  
368 SDS-PAGE gel.

### 369 **Pronase digestion assay**

370 Lyophilized *S. griseus* pronase (Roche) was dissolved in Milli-Q water to a stock concentration  
371 of 6 mg/ml and stored at 4°C for a maximum of 3 days. After 1 hour of incubation of CFE  
372 reactions with SUPER templates, the beads were pelleted by centrifugation at 300 g for 3  
373 minutes. The supernatant was then gently removed and collected for fluorescence gel imaging.  
374 The remaining bead pellets were washed twice with 1 ml of PBS (Ca<sup>2+</sup> and Mg<sup>2+</sup>-free, pH 7.5)

375 by centrifugation at 200 g for 2 minutes, followed by resuspension in 20  $\mu$ l of PBS. Next, 10  $\mu$ l  
376 of the SUPER templated beads in PBS was incubated with 5  $\mu$ l of pronase stock solution (6  
377 mg/ml) at room temperature for 15 minutes. The final concentration of pronase was 2 mg/ml,  
378 and the other 10  $\mu$ l of beads were used for observing the protein incorporation as a control.  
379 Confocal fluorescence images were taken 15 minutes after the addition of pronase.

### 380 **Confocal fluorescence microscopy and in-gel imaging of in vitro reconstituted Pkd2.**

381 All images were acquired using an oil immersion 60 $\times$ /1.4 NA Plan-Apochromat objective with  
382 an Olympus IX-81 inverted fluorescence microscope (Olympus, Japan) controlled by  
383 MetaMorph software (Molecular Devices, USA) equipped with a CSU-X1 spinning disk  
384 confocal head (Yokogawa, Japan), AOTF-controlled solid-state lasers (Andor, Ireland), and an  
385 iXON3 EMCCD camera (Andor). Images of sfGFP and lipid fluorescence were acquired with  
386 488 nm laser excitation at an exposure time of 500 ms and with 561 nm laser excitation at an  
387 exposure time of 100 ms, respectively. Each acquired image contained  $\sim$ 5 lipid bilayer vesicles  
388 or  $\sim$ 10 lipid-coated beads that had settled upon a 96-well glass-bottom plate or a coverslip,  
389 respectively. Three images were taken at different locations across a well or coverslip for an  
390 individual experiment. Three independent repeats were carried out for each experimental  
391 condition. Samples were always freshly prepared before each experiment.

392 FluoroTect Green lysine-tRNA (green lysine) was purchased from Promega. In-gel  
393 imaging of Pkd2-sfGFP or Pkd2 was carried out on a Sapphire biomolecular imager (Azure  
394 Biosystems). Samples were not heated to retain in-gel sfGFP and green lysine fluorescence.

### 395 **Image analysis**

396 To quantify the fluorescence inside the lipid bilayer vesicles, all images were analyzed using  
397 MATLAB. All data are included for analysis without blinding. Since all the vesicles were  
398 labeled with rhodamine PE, the edges/boundaries of vesicles were first detected and isolated,  
399 corresponding to the red fluorescence rings using the function 'imfindcircles' embedded in  
400 MATLAB. Averaged background intensity measurements were then performed for each image  
401 by the average fluorescence (of all pixels), excluding the area of vesicles defined by the code in  
402 MATLAB from the previous step. For quantification, the final fluorescence intensity of each  
403 vesicle was obtained by averaging the fluorescence of all the pixels inside the vesicles after  
404 subtracting the average background intensity. For the box plots marking the first and third  
405 quartile and the median in **Fig. 2F**, each data point represents the fluorescence of one vesicle  
406 after normalization with respect to the average background subtracted fluorescence intensity of  
407 vesicles corresponding to the cell-free expressed proteins at time zero under each condition.  
408 Since there are two independent variables, time and osmotic condition/osmolarity, statistical  
409 analysis was performed using two-way ANOVA followed by Dunnett's post-hoc test for all data  
410 among all groups throughout the whole experiment. The quantitative data was  
411 compared/analyzed between the individual groups at a certain time followed by a two-tailed *t*-  
412 test with a significance level of 0.05.  $P < 0.05$  was considered statistically significant. *P* values  
413 are indicated as \*:  $P < 0.05$ ; \*\*:  $P < 0.01$ ; \*\*\*:  $P < 0.001$ .

#### 414 **Yeast genetics and cell culture**

415 We followed the standard protocols for yeast cell culture and genetics (Moreno et al., 1991).  
416 Tetrads were dissected with a Spore+ micromanipulator (Singer, UK). All the fission yeast  
417 strains used in this study are listed in **Supplemental Table S2**.

#### 418 **Microscopy of fission yeast cells**

419 For microscopy, cells were first inoculated in a YE5S medium for two days at 25°C. 1 ml of the  
420 exponentially growing cell culture, at a density between  $5 \times 10^6$ /ml and  $1.0 \times 10^7$ /ml, was harvested  
421 by centrifugation at 4,000 rpm for 1 min. They were washed three times with synthetic EMM  
422 medium ( $[Ca^{2+}] = 107 \mu M$ ) and re-suspended in 1 ml of EMM before proceeding for  
423 microscopy. 20  $\mu l$  of the resuspended cells were spotted in a 10-mm Petri dish with a glass  
424 coverslip (#1.5) at the bottom (D35-10-1.5N, Cellvis, USA). The coverslip was pre-coated with  
425 50  $\mu l$  of 50  $\mu g/ml$  lectin (Sigma, L2380) and allowed to dry overnight at 4°C. The cells were  
426 allowed to attach to the coverslip for 10 mins at room temperature before addition of another 2  
427 ml EMM in the Petri dish.

428 We employed a spinning disk confocal microscope for fluorescence microscopy using an  
429 Olympus IX71 unit equipped with a CSU-X1 spinning-disk unit (Yokogawa, Japan). The  
430 motorized stage (ASI, USA) includes a Piezo Z Top plate for acquiring Z-series. The images  
431 were captured on an EMCCD camera (IXON-897, Andor) controlled by iQ3.0 (Andor). Solid-  
432 state lasers of 488 and 561 nm were used at a power of no more than 2.5 mW. Unless specified,  
433 we used a 60 $\times$ objective lens (Olympus, Plan Apochromat, NA = 1.40). A Z-series of 8 slices at a  
434 spatial distance of 1  $\mu m$  was captured at each time point. The microscopy was carried out in a  
435 designated room maintained at  $22 \pm 2^\circ C$ . To minimize environmental variations, we typically  
436 imaged both control and experimental groups in randomized order on the same day.

437 We employed a CellASIC ONIX2 system controlled by a desktop computer through the  
438 ONIX software (EMD Millipore) to apply osmotic shock. Using yeast haploid microfluidics  
439 plate (Y04C, EMD Millipore), we pushed the cells into the imaging chamber at a pressure of 5-8  
440 PSI for a minimum of 2 minutes using EMM media. The trapped cells were equilibrated in EMM

441 for 10 mins at a pressure of 1.45 PSI. The same pressure was applied for the media exchange  
442 afterwards.

### 443 **Calcium imaging of fission yeast cells and data analysis**

444 To measure the intracellular calcium level of single fission yeast cells, we quantified the  
445 fluorescence intensity of cells expressing GCaMP-mCherry (Poddar et al., 2021). Whenever a  
446 temperature shift was required, cells were imaged after incubation at 36°C for 4 hours. The  
447 fluorescence intensity of each cell was quantified using average intensity projections of the Z-  
448 series after the background subtraction. To measure the intracellular fluorescence, we quantified  
449 the average fluorescence intensity on a line drawn along the long axis of a cell. Background  
450 fluorescence was calculated similarly by measuring the areas without any cells.

451 For time-lapse measurement of calcium spikes, we quantified the fluorescence intensity  
452 of cells expressing GCaMP. The GCaMP fluorescence was quantified from the average intensity  
453 projection of the Z-series on a line along the long axis of a cell throughout osmotic shock. The  
454 fluorescence intensities were background subtracted and normalized to the average value before  
455 application of osmotic shock. Amplitudes of a calcium spike were defined as  $\Delta F/F_0$ .  $\Delta F$  equals to  
456  $F_{\max}$ , the maximum value during the first ten minutes after osmotic shock, minus the baseline  
457 value  $F_0$ , calculated as the average of the five data points before osmotic shock.

### 458 **Prz1 localization**

459 To measure the nuclear enrichment of Prz1 in single cells, we quantified the nuclear to  
460 cytoplasmic fluorescence intensity of cells expressing Prz1-GFP from the center slice of the Z-  
461 series. The nuclear localization of Prz1-GFP was measured by quantifying GFP fluorescence  
462 intensities in the nuclei with background subtraction. We assumed the nucleus as a circle  
463 measuring 2  $\mu\text{m}$  diameter at the center of a cell. The cytoplasmic fluorescence intensities of

464 Prz1-GFP were quantified as the fluorescence of the total intracellular fluorescence of Prz1-GFP  
465 minus the fluorescence intensity in the nucleus. We used NIH ImageJ and custom-made macros  
466 to process all the micrographs.

#### 467 **Acknowledgments**

468 This work has been supported by National Institutes of Health grants R21GM134167 and R01  
469 EB030031 to AL. It has also been supported by the University of Toledo startup fund and  
470 National Institutes of Health grant R15GM134496 and R01GM144652 to QC. FZ has been  
471 supported by the University of Toledo Undergraduate Summer Research and Creative Activities  
472 Program. The content is solely the responsibility of the authors and does not necessarily  
473 represent the official views of the National Institutes of Health. The authors declare no  
474 competing interests.

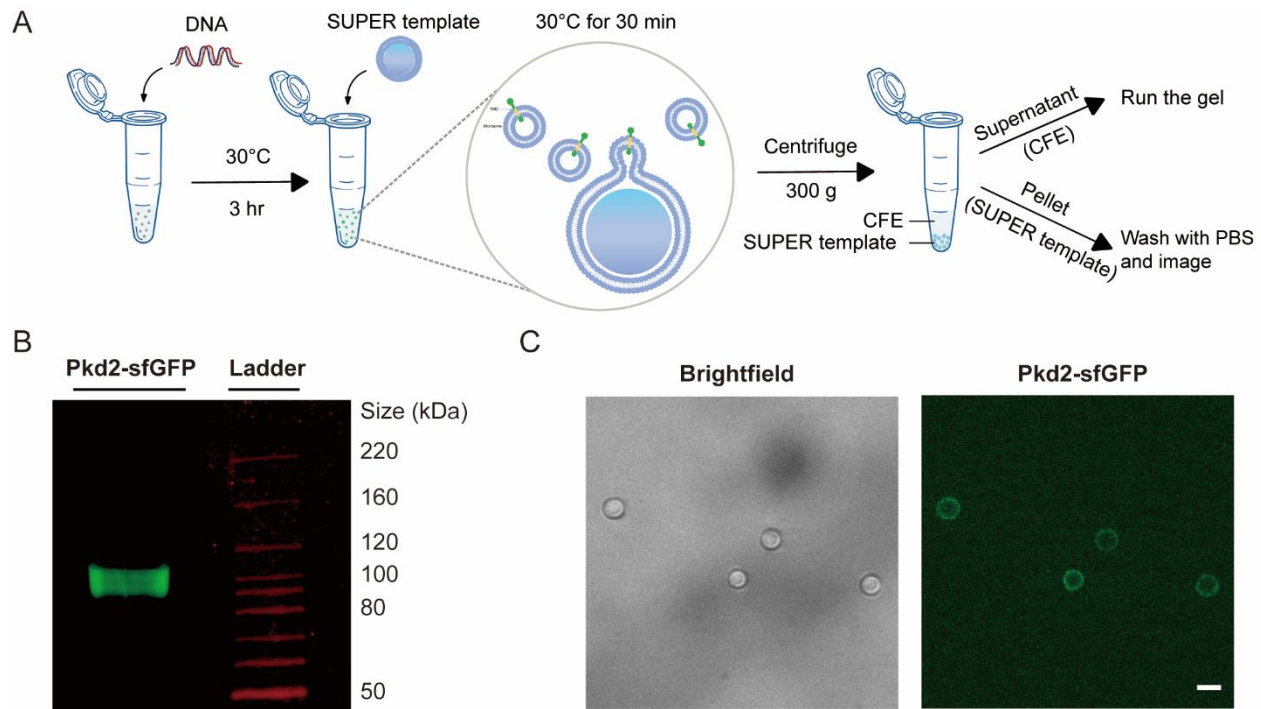

475

476 **Figure 1: Localization of cell-free expressed Pkd2 in SUPER template.** (A) Schematic  
477 illustrating the use of CFE for in vitro protein production and testing the incorporation of  
478 membrane proteins by using SUPER templates. SUPER templated beads are added to the CFE  
479 reaction expressing Pkd2 protein fused to sfGFP at the C-terminus and incubated together. CFE  
480 reaction and SUPER templates are then isolated by low-speed centrifugation for running a gel or  
481 imaging, respectively. (B) Fluorescence gel image of cell-free expressed Pkd2-sfGFP added to  
482 SUPER templates. (C) Brightfield and fluorescence micrograph of SUPER templates incubated  
483 with cell-free expressed Pkd2-sfGFP. Beads were washed with PBS before imaging. Scale bar:  
484 10  $\mu$ m.



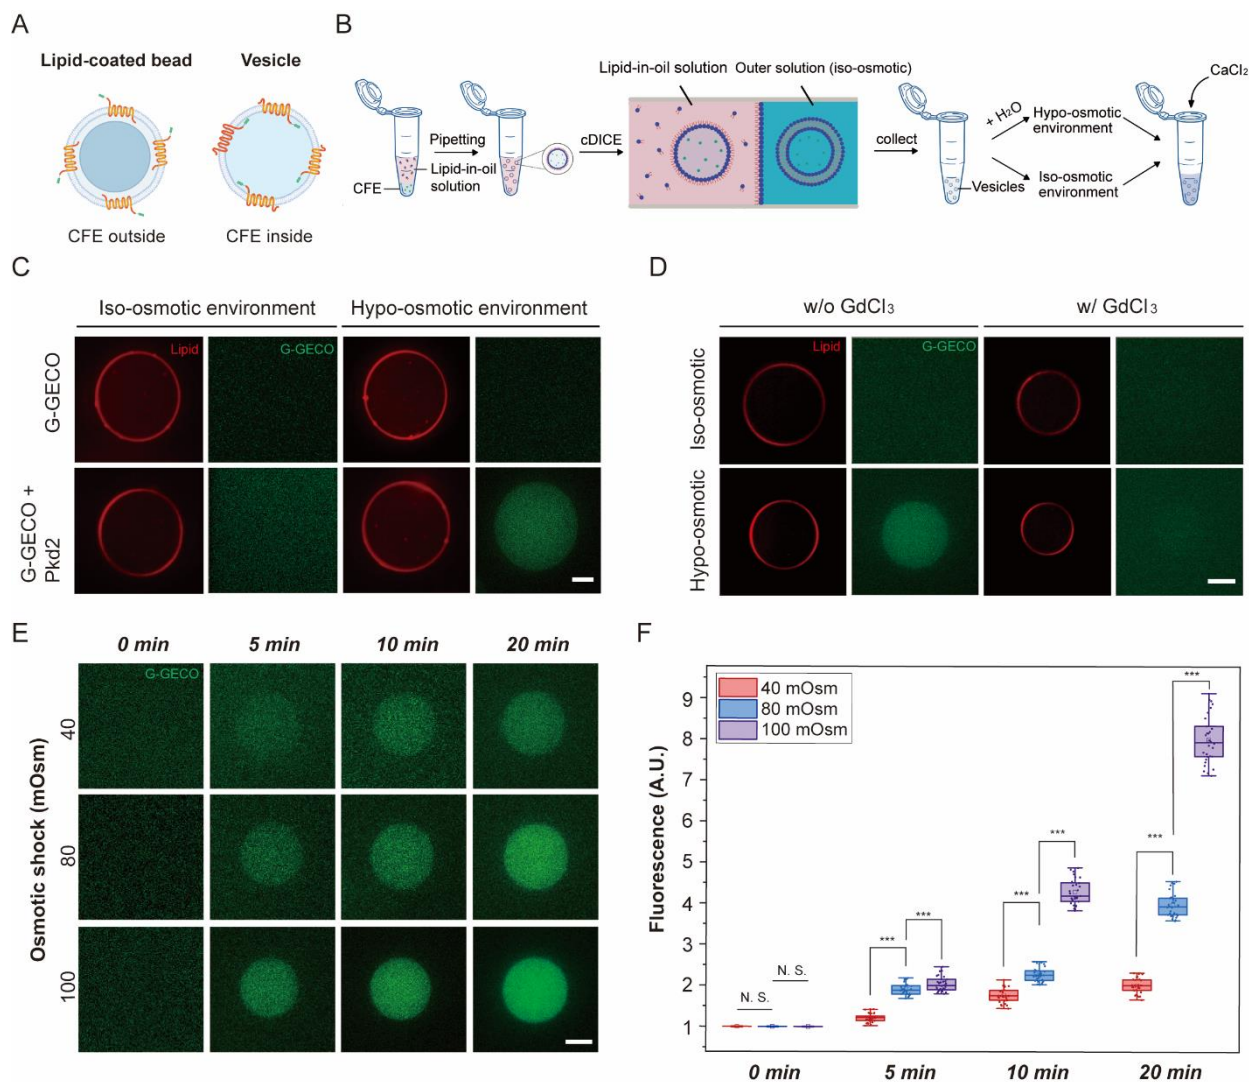

485

486 **Figure 2: Pkd2 reconstituted in GUVs responds to osmotic pressure.** (A) Schematic  
 487 illustrating the directional insertion of cell-free expressed Pkd2 protein into the lipid bilayer  
 488 membrane of SUPER templated beads and GUVs. Pkd2 channels are oriented with their C-  
 489 termini protruding away from the lipid-coated beads and with their C-termini pointing inside the  
 490 vesicles. (B) Schematic illustrates the formation of vesicles encapsulating cell-free expressed  
 491 proteins using cDICE, followed by applying osmotic shock to Pkd2-containing GUVs. Vesicles  
 492 were formed in iso-osmotic conditions and then milli-Q water was added to the outer solution to  
 493 create a hypo-osmotic environment. 100 mM CaCl<sub>2</sub> stock solution is added to the hypo-osmotic  
 494 external solution to a final concentration of 10 mM. (C) Representative fluorescence  
 495 micrographs of vesicles encapsulating 1 mM EGTA and cell-free expressed Pkd2 and G-GECO  
 496 at t = 10 min after applying osmotic shock. Plasmid concentrations of Pkd2 and G-GECO were  
 497 fixed at 1 nM. The final concentration of Ca<sup>2+</sup> in the hypo-osmotic external solution was 10 mM.  
 498 The aqueous external solution was made by diluting the external solution stock (HEPES: MgCl<sub>2</sub>:  
 499 KCl: glucose (in mM) = 15:3:150:50) with milli-Q water. The osmolarity difference between iso-  
 500 osmotic and hypo-osmotic solutions was kept at 100 mOsm. (D) Representative fluorescence  
 501 micrographs of vesicles expressing Pkd2 and G-GECO with addition of GdCl<sub>3</sub> for blocking the



502 force-activated function of Pkd2 channels under osmotic shock. GdCl<sub>3</sub> was added to the outer  
503 solution with the final concentration fixed at 1 mM. The same method and solutions/conditions  
504 described in (C) applied osmotic pressure to the vesicles. The images were taken 15 minutes  
505 after the application of osmotic shock. Vesicles expressing Pkd2 and G-GECO without the  
506 addition of GdCl<sub>3</sub> served as a control. **(E)** Representative fluorescence micrographs of vesicles  
507 encapsulating cell-free expressed Pkd2 and G-GECO under different hypo-osmotic environments  
508 at specified time points. The concentrations of EGTA, Pkd2, G-GECO, and Ca<sup>2+</sup> were the same  
509 as indicated in (C). **(F)** Box plot depicting the fluorescence intensities of vesicles under different  
510 osmotic conditions and times. At least thirty vesicles were analyzed for each condition. All  
511 experiments were repeated three times under identical conditions. Scale bars: 10 μm. \*\*\*: P <  
512 0.001.

513

514

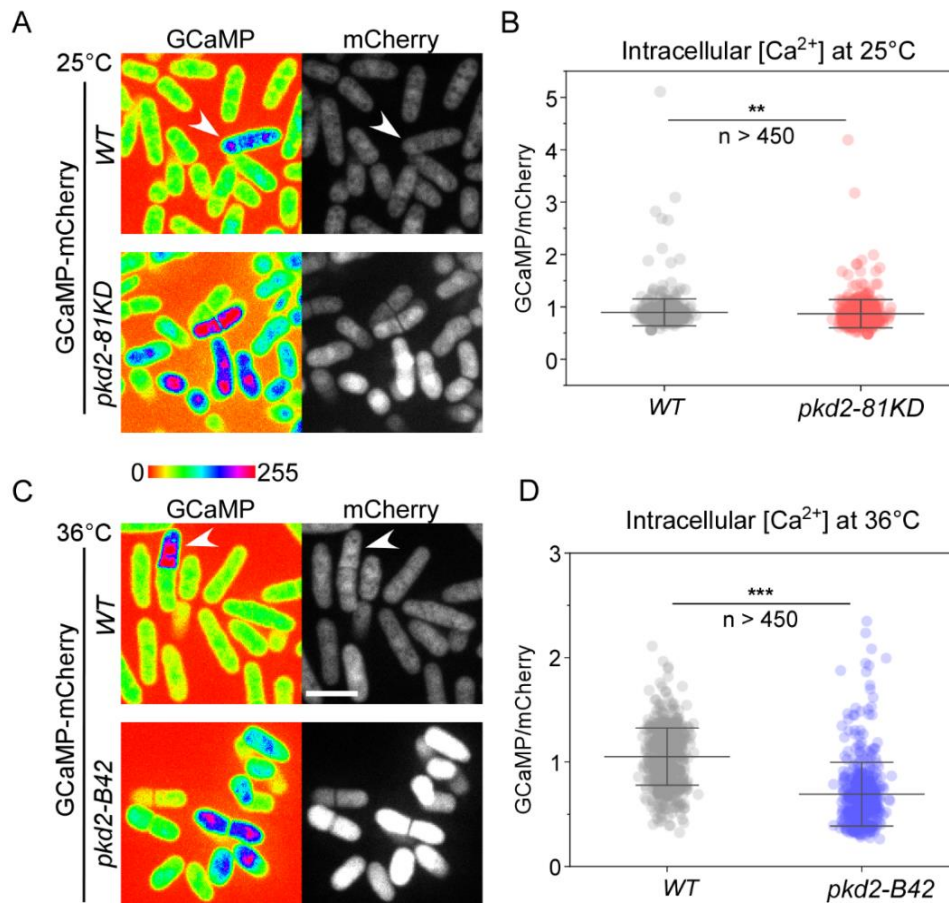

515

516 **Figure 3: Intracellular calcium level was reduced in *pkd2* mutant cells.** The intracellular  
517 calcium level of *wild type* (*WT*) and *pkd2* mutant cells at either the permissive temperature of  
518 25°C (A and B) or the restrictive temperature of 36°C (C and D). (A and C) Representative  
519 fluorescence micrographs of *wild type* (top) and *pkd2* mutant (bottom) cells expressing GCaMP-  
520 mCherry. Arrowhead: a cell with elevated calcium level. (B and D) Scatter interval plot of  
521 intracellular calcium level of the *wild type* and the *pkd2* mutant cells. The average calcium level  
522 of *pkd2-81KD* cells was 3% lower than that of *wild type* cells. In contrast, the average calcium  
523 level of *pkd2-B42* cells was 34% lower than the *wild type* at 36°C. All data are pooled from three  
524 biological repeats. \*\*: P < 0.01. \*\*\*: P < 0.001. Two-tailed student t-tests with unequal variants  
525 were used. Scale bars: 10  $\mu$ m.

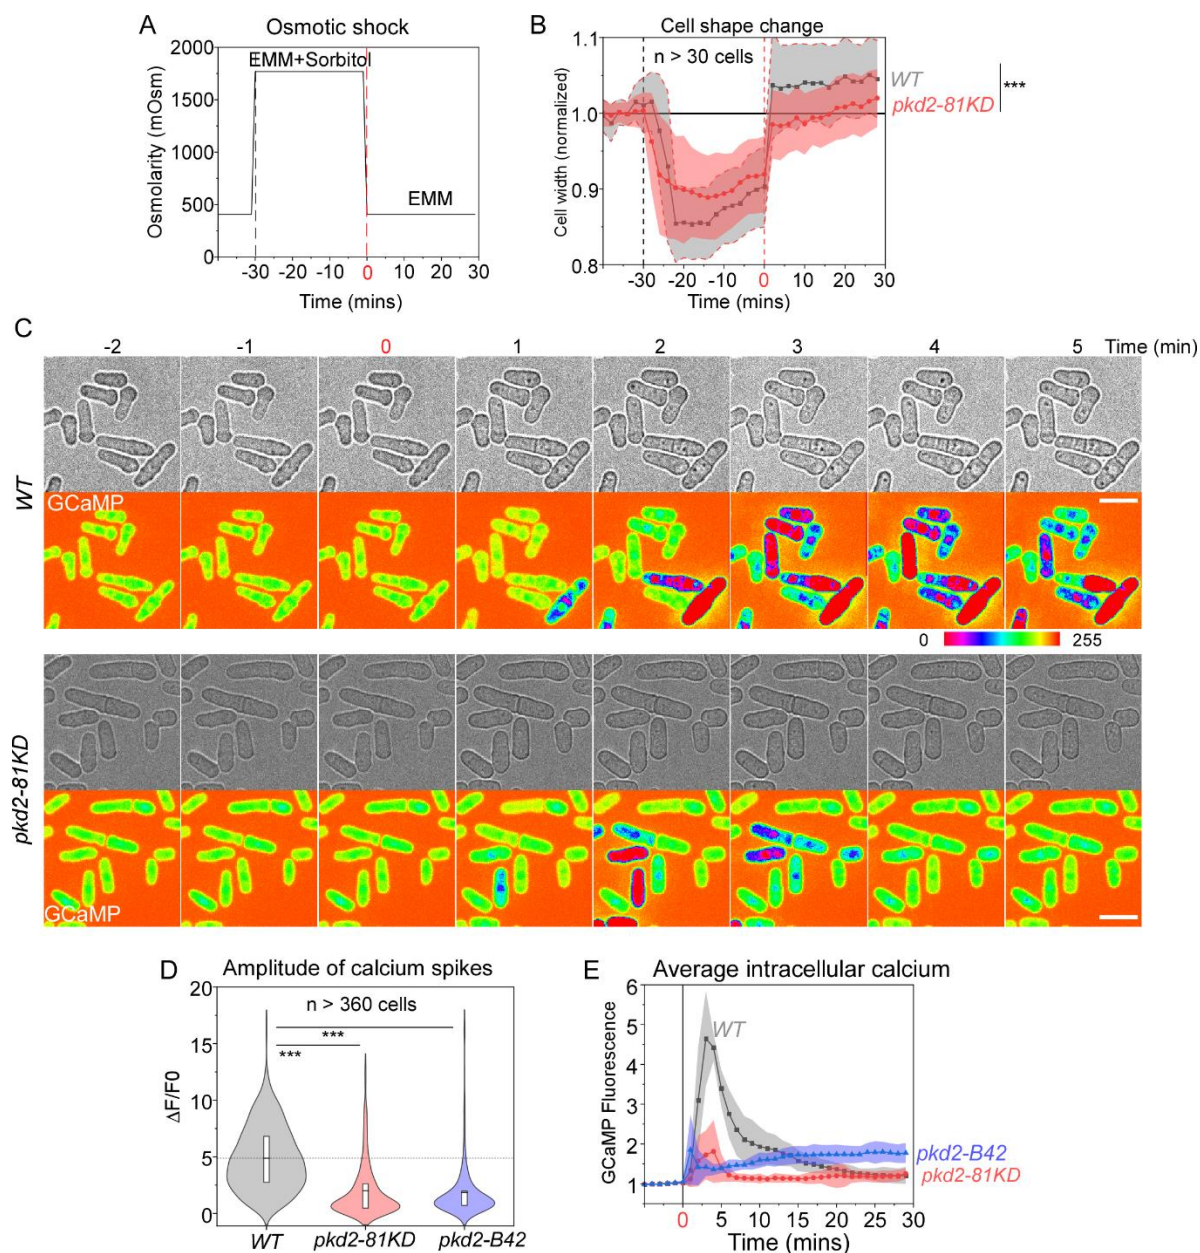

526

527 **Figure 4: Pkd2 mutations reduced calcium spikes triggered by hypo-osmotic shock. (A)**  
 528 Time course of the osmolarity of the extracellular environment in the microfluidics chamber.  
 529 Time zero: application of hypo-osmotic shock through replacing EMM plus 1.2M sorbitol with  
 530 EMM media. **(B)** Time course of the cell width changes during the hypo-osmotic shock. Cloud  
 531 represents standard deviations. Both *wild type* (WT) and *pkd2-81KD* cells expanded their cell  
 532 width significantly after shock, but the *wild type* expanded more than the *pkd2-81KD* mutant. **(C)**  
 533 Time-lapse micrographs of *wild type* and *pkd2-81KD* cells expressing GCaMP. The hypo-  
 534 osmotic shock triggered calcium spikes. **(D)** Violin plot comparing calcium spikes amplitude of  
 535 *wild type*, *pkd2-81KD*, and *pkd2-B42* cells (n > 360). **(E)** Time course of normalized GCaMP  
 536 fluorescence during hypo-osmotic shock. Cloud represents standard deviations. All data are  
 537 pooled from at least three biological repeats. \*\*\*: P < 0.001. Two-tailed student t-tests with  
 538 unequal variants were used. Scale bars: 10  $\mu$ m.

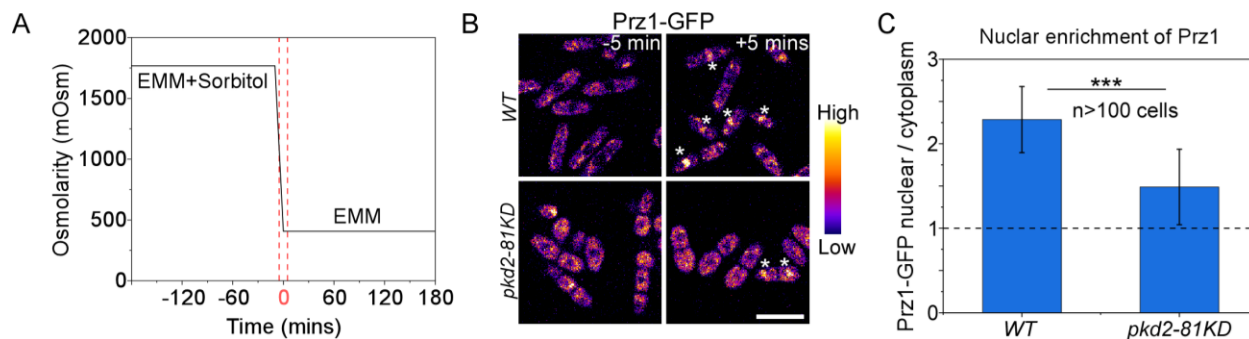

539

540 **Figure 5: Pkd2 mutation reduced nuclear localization of Prz1 following hypo-osmotic**  
541 **shock. (A)** Time course of the osmolarity of the extracellular environment. Time zero:  
542 application of hypo-osmotic shock by switching from EMM plus 1.2M sorbitol to EMM. Dashed  
543 lines: -5 min and +5 mins are when the fluorescence micrographs (B) were taken. (B)  
544 Representative fluorescence micrographs of *wild type* (WT) and *pkd2-81KD* cells expressing  
545 Prz1-GFP before or after the hypo-osmotic shock. Asterisks: a cell with Prz1-GFP localized in  
546 the nucleus. Number represent time relative to the hypo-osmotic shock in minutes. (C) Bar graph  
547 of the normalized enrichment of nuclear Prz1-GFP after the hypo-osmotic shock (n > 100 cells).  
548 Data are pooled from three biological repeats. \*\*\*: P < 0.001 (Two-tailed student t-test). Scale  
549 bars: 10  $\mu$ m.

550 **References**

- 551 Balasubramanian, M.K., D. McCollum, L. Chang, K.C. Wong, N.I. Naqvi, X. He, S. Sazer, and  
552 K.L. Gould. 1998. Isolation and characterization of new fission yeast cytokinesis mutants.  
553 *Genetics*. 149:1265-1275.
- 554 Barr, M.M., and P.W. Sternberg. 1999. A polycystic kidney-disease gene homologue required for  
555 male mating behaviour in *C. elegans*. *Nature*. 401:386-389.
- 556 Bashirzadeh, Y., N. Wubshet, T. Litschel, P. Schwille, and A.P. Liu. 2021. Rapid Encapsulation  
557 of Reconstituted Cytoskeleton inside Giant Unilamellar Vesicles. *J Vis Exp*.
- 558 Batiza, A.F., T. Schulz, and P.H. Masson. 1996. Yeast respond to hypotonic shock with a calcium  
559 pulse. *The Journal of biological chemistry*. 271:23357-23362.
- 560 Chong, S. 2014. Overview of cell-free protein synthesis: historic landmarks, commercial systems,  
561 and expanding applications. *Curr Protoc Mol Biol*. 108:16 30 11-11.
- 562 Dondapati, S.K., M. Kreir, R.B. Quast, D.A. Wustenhagen, A. Bruggemann, N. Fertig, and S.  
563 Kubick. 2014. Membrane assembly of the functional KcsA potassium channel in a vesicle-  
564 based eukaryotic cell-free translation system. *Biosens Bioelectron*. 59:174-183.
- 565 Forman, J.R., S. Qamar, E. Paci, R.N. Sandford, and J. Clarke. 2005. The remarkable mechanical  
566 strength of polycystin-1 supports a direct role in mechanotransduction. *Journal of*  
567 *molecular biology*. 349:861-871.
- 568 Gao, Z., D.M. Ruden, and X. Lu. 2003. PKD2 cation channel is required for directional sperm  
569 movement and male fertility. *Curr Biol*. 13:2175-2178.
- 570 Gonzalez-Perrett, S., K. Kim, C. Ibarra, A.E. Damiano, E. Zotta, M. Batelli, P.C. Harris, I.L. Reisin,  
571 M.A. Arnaout, and H.F. Cantiello. 2001. Polycystin-2, the protein mutated in autosomal  
572 dominant polycystic kidney disease (ADPKD), is a Ca<sup>2+</sup>-permeable nonselective cation  
573 channel. *Proceedings of the National Academy of Sciences of the United States of America*.  
574 98:1182-1187.
- 575 Gregorio, N.E., M.Z. Levine, and J.P. Oza. 2019. A User's Guide to Cell-Free Protein Synthesis.  
576 *Methods Protoc*. 2.
- 577 Hirayama, S., R. Sugiura, Y. Lu, T. Maeda, K. Kawagishi, M. Yokoyama, H. Tohda, Y. Giga-  
578 Hama, H. Shuntoh, and T. Kuno. 2003. Zinc finger protein Prz1 regulates Ca<sup>2+</sup> but not Cl<sup>-</sup>  
579 homeostasis in fission yeast. Identification of distinct branches of calcineurin signaling  
580 pathway in fission yeast. *The Journal of biological chemistry*. 278:18078-18084.
- 581 Huang, K., D.R. Diener, A. Mitchell, G.J. Pazour, G.B. Witman, and J.L. Rosenbaum. 2007.  
582 Function and dynamics of PKD2 in *Chlamydomonas reinhardtii* flagella. *The Journal of*  
583 *cell biology*. 179:501-514.
- 584 Hughes, J., C.J. Ward, B. Peral, R. Aspinwall, K. Clark, J.L. San Millan, V. Gamble, and P.C.  
585 Harris. 1995. The polycystic kidney disease 1 (PKD1) gene encodes a novel protein with  
586 multiple cell recognition domains. *Nature genetics*. 10:151-160.
- 587 Jia, B., and C.O. Jeon. 2016. High-throughput recombinant protein expression in *Escherichia coli*:  
588 current status and future perspectives. *Open Biol*. 6.
- 589 Jumper, J., R. Evans, A. Pritzel, T. Green, M. Figurnov, O. Ronneberger, K. Tunyasuvunakool, R.  
590 Bates, A. Zidek, A. Potapenko, A. Bridgland, C. Meyer, S.A.A. Kohli, A.J. Ballard, A.  
591 Cowie, B. Romera-Paredes, S. Nikolov, R. Jain, J. Adler, T. Back, S. Petersen, D. Reiman,  
592 E. Clancy, M. Zielinski, M. Steinegger, M. Pacholska, T. Berghammer, S. Bodenstein, D.  
593 Silver, O. Vinyals, A.W. Senior, K. Kavukcuoglu, P. Kohli, and D. Hassabis. 2021. Highly  
594 accurate protein structure prediction with AlphaFold. *Nature*.



- 595 Khambhati, K., G. Bhattacharjee, N. Gohil, D. Braddick, V. Kulkarni, and V. Singh. 2019.  
596 Exploring the Potential of Cell-Free Protein Synthesis for Extending the Abilities of  
597 Biological Systems. *Front Bioeng Biotechnol.* 7:248.
- 598 Knol, J., K. Sjollem, and B. Poolman. 1998. Detergent-mediated reconstitution of membrane  
599 proteins. *Biochemistry.* 37:16410-16415.
- 600 Laohakunakorn, N., L. Grasmann, B. Lavickova, G. Michielin, A. Shahein, Z. Swank, and S.J.  
601 Maerkl. 2020. Bottom-Up Construction of Complex Biomolecular Systems With Cell-Free  
602 Synthetic Biology. *Front Bioeng Biotechnol.* 8:213.
- 603 Lima, W.C., A. Vinet, J. Pieters, and P. Cosson. 2014. Role of PKD2 in rheotaxis in Dictyostelium.  
604 *PLoS One.* 9:e88682.
- 605 Liu, X., T. Vien, J. Duan, S.H. Sheu, P.G. DeCaen, and D.E. Clapham. 2018. Polycystin-2 is an  
606 essential ion channel subunit in the primary cilium of the renal collecting duct epithelium.  
607 *eLife.* 7.
- 608 Lu, Y. 2017. Cell-free synthetic biology: Engineering in an open world. *Synth Syst Biotechnol.*  
609 2:23-27.
- 610 Majumder, S., J. Garamella, Y.L. Wang, M. DeNies, V. Noireaux, and A.P. Liu. 2017. Cell-sized  
611 mechanosensitive and biosensing compartment programmed with DNA. *Chem Commun*  
612 *(Camb).* 53:7349-7352.
- 613 Majumder, S., P.T. Willey, M.S. DeNies, A.P. Liu, and G.W.G. Luxton. 2018. A synthetic biology  
614 platform for the reconstitution and mechanistic dissection of LINC complex assembly. *J*  
615 *Cell Sci.* 132.
- 616 Majumder, S., P.T. Willey, M.S. DeNies, A.P. Liu, and G.W.G. Luxton. 2019. Correction: A  
617 synthetic biology platform for the reconstitution and mechanistic dissection of LINC  
618 complex assembly (doi:10.1242/jcs.219451). *J Cell Sci.* 132.
- 619 Maundrell, K. 1990. nmt1 of fission yeast. A highly transcribed gene completely repressed by  
620 thiamine. *The Journal of biological chemistry.* 265:10857-10864.
- 621 Mochizuki, T., G. Wu, T. Hayashi, S.L. Xenophontos, B. Veldhuisen, J.J. Saris, D.M. Reynolds,  
622 Y. Cai, P.A. Gabow, A. Pierides, W.J. Kimberling, M.H. Breuning, C.C. Deltas, D.J. Peters,  
623 and S. Somlo. 1996. PKD2, a gene for polycystic kidney disease that encodes an integral  
624 membrane protein. *Science (New York, N.Y).* 272:1339-1342.
- 625 Moreno, S., A. Klar, and P. Nurse. 1991. Molecular genetic analysis of fission yeast  
626 *Schizosaccharomyces pombe*. *Methods in enzymology.* 194:795-823.
- 627 Morris, Z., D. Sinha, A. Poddar, B. Morris, and Q. Chen. 2019. Fission yeast TRP channel Pkd2p  
628 localizes to the cleavage furrow and regulates cell separation during cytokinesis. *Molecular*  
629 *biology of the cell.* 30:1791-1804.
- 630 Nakayama, Y., K. Yoshimura, and H. Iida. 2012. Organellar mechanosensitive channels in fission  
631 yeast regulate the hypo-osmotic shock response. *Nature communications.* 3:1020.
- 632 Nauli, S.M., F.J. Alenghat, Y. Luo, E. Williams, P. Vassilev, X. Li, A.E. Elia, W. Lu, E.M. Brown,  
633 S.J. Quinn, D.E. Ingber, and J. Zhou. 2003. Polycystins 1 and 2 mediate mechanosensation  
634 in the primary cilium of kidney cells. *Nature genetics.* 33:129-137.
- 635 Neumann, S., T.J. Pucadyil, and S.L. Schmid. 2013. Analyzing membrane remodeling and fission  
636 using supported bilayers with excess membrane reservoir. *Nat Protoc.* 8:213-222.
- 637 Palmer, C.P., E. Aydar, and M.B. Djamgoz. 2005. A microbial TRP-like polycystic-kidney-  
638 disease-related ion channel gene. *The Biochemical journal.* 387:211-219.
- 639 Pittman, J.K. 2011. Vacuolar Ca(2+) uptake. *Cell calcium.* 50:139-146.

- 640 Poddar, A., O. Sidibe, A. Ray, and Q. Chen. 2021. Calcium spikes accompany cleavage furrow  
641 ingression and cell separation during fission yeast cytokinesis. *Molecular biology of the*  
642 *cell*. 32:15-27.
- 643 Protchenko, O., R. Rodriguez-Suarez, R. Androphy, H. Bussey, and C.C. Philpott. 2006. A screen  
644 for genes of heme uptake identifies the FLC family required for import of FAD into the  
645 endoplasmic reticulum. *The Journal of biological chemistry*. 281:21445-21457.
- 646 Pucadyil, T.J., and S.L. Schmid. 2008. Real-time visualization of dynamin-catalyzed membrane  
647 fission and vesicle release. *Cell*. 135:1263-1275.
- 648 Pucadyil, T.J., and S.L. Schmid. 2010. Supported bilayers with excess membrane reservoir: a  
649 template for reconstituting membrane budding and fission. *Biophys J*. 99:517-525.
- 650 Rigaud, J.L., and D. Levy. 2003. Reconstitution of membrane proteins into liposomes. *Methods*  
651 *Enzymol*. 372:65-86.
- 652 Shen, P.S., X. Yang, P.G. DeCaen, X. Liu, D. Bulkley, D.E. Clapham, and E. Cao. 2016. The  
653 Structure of the Polycystic Kidney Disease Channel PKD2 in Lipid Nanodiscs. *Cell*.  
654 167:763-773 e711.
- 655 Sinha, D., D. Ivan, E. Gibbs, M. Chetluru, J. Goss, and Q. Chen. 2022. Fission yeast polycystin  
656 Pkd2p promotes cell size expansion and antagonizes the Hippo-related SIN pathway.  
657 *Journal of cell science*. 135.
- 658 Van de Cauter, L., F. Fanalista, L. van Buren, N. De Franceschi, E. Godino, S. Bouw, C. Danelon,  
659 C. Dekker, G.H. Koenderink, and K.A. Ganzinger. 2021. Optimized cDICE for Efficient  
660 Reconstitution of Biological Systems in Giant Unilamellar Vesicles. *ACS Synth Biol*.  
661 10:1690-1702.
- 662 Verde, F., D.J. Wiley, and P. Nurse. 1998. Fission yeast orb6, a ser/thr protein kinase related to  
663 mammalian rho kinase and myotonic dystrophy kinase, is required for maintenance of cell  
664 polarity and coordinates cell morphogenesis with the cell cycle. *Proceedings of the*  
665 *National Academy of Sciences of the United States of America*. 95:7526-7531.
- 666 Vjestica, A., M. Marek, P.J. Nkosi, L. Merlini, G. Liu, M. Berard, I. Billault-Chaumartin, and S.G.  
667 Martin. 2020. A toolbox of stable integration vectors in the fission yeast  
668 *Schizosaccharomyces pombe*. *J Cell Sci*. 133.
- 669 Wang, Z., C. Ng, X. Liu, Y. Wang, B. Li, P. Kashyap, H.A. Chaudhry, A. Castro, E.M. Kalontar,  
670 L. Ilyayev, R. Walker, R.T. Alexander, F. Qian, X.Z. Chen, and Y. Yu. 2019. The ion  
671 channel function of polycystin-1 in the polycystin-1/polycystin-2 complex. *EMBO reports*.  
672 20:e48336.
- 673 Wingfield, P.T. 2015. Overview of the purification of recombinant proteins. *Curr Protoc Protein*  
674 *Sci*. 80:6 1 1-6 1 35.
- 675 Xu, S., W.A. Cramer, A.A. Peterson, M. Hermodson, and C. Montecucco. 1988. Dynamic  
676 properties of membrane proteins: reversible insertion into membrane vesicles of a colicin  
677 E1 channel-forming peptide. *Proc Natl Acad Sci U S A*. 85:7531-7535.
- 678 Zhou, X.L., and C. Kung. 1992. A mechanosensitive ion channel in *Schizosaccharomyces pombe*.  
679 *The EMBO journal*. 11:2869-2875.

680
